# Supplementary material for: A machine learning assistant for detecting fraudulent activities in synchronous online programming exams
Source: PeerJ journal article supplement (doi:10.7717/peerj-cs.3159), 2025-09-09
Supplement: assistant.zip [file VeyonHD.pdf › assistant/src/main/resources/VeyonHD.pdf]

Yeyon Master

Monitoring Fullscreen demo Window demo Lock Remote view Remote control Power on Reboot Power down Log in Log off Text message Run program Open website File transfer Screenshot Record

Archivo Editar Ver Git Proyecto Compilar Depurar Prueba Analizar Herramientas Extensiones Ventana Ayuda Buscar codeanalysis-web

codeanalysis-web

codeanalysis\_web.Controllers.AnalysesController

```
48 }
49
50 return RedirectToAction("Error", "Home", new { statusCode = (int)result.StatusCode, message = result.Content });
51 }
52
53 [Authorize]
54 [HttpGet]
55 0 referencias | 0 cambios | 0 autores, 0 cambios
56 public async Task<IActionResult> Create()
57 {
58     var result = await _categoriesService.GetCategories();
59     if (result.IsSuccessful)
60     {
61         string[] categories = JsonConvert.DeserializeObject<string[]>(result.Content);
62         ViewBag.Categories = new SelectList(categories.OrderBy(x => x));
63     }
64     else
65     {
66         return RedirectToAction("Error", "Home", new { statusCode = (int)result.StatusCode, message = result.Content });
67     }
68
69     result = await _syntacticConstructsService.GetSyntacticConstructs();
70     if (result.IsSuccessful)
71     {
72         string[] syntacticConstructs = JsonConvert.DeserializeObject<string[]>(result.Content);
73         ViewBag.SyntacticConstructs = new SelectList(syntacticConstructs.OrderBy(x => x));
74     }
75     else
76     {
77         return RedirectToAction("Error", "Home", new { statusCode = (int)result.StatusCode, message = result.Content });
78     }
79     return View(new CreateAnalysisModel() { RDN = ReverseMail(User.FindFirstValue(ClaimTypes.Email)).ToLower() + ".analyses." });
80 }
81 [Authorize]
82 [HttpPost]
83 0 referencias | uo296434, Hace 225 días | 1 autor, 1 cambio
84 public async Task<IActionResult> Create(CreateAnalysisModel model)
85 {
86     if (ModelState.IsValid && model.IsValid())
87     {
```

121 % 0 33 Línea: 12 Carácter: 19 SPC CRLF

Explorador de pruebas Lista de errores Salida Consola del Administrador de paquetes PowerShell para desarrolladores

Listo

0/0 6 ines codeanalysis

20:13 31/01/2025

TOM SMITH - UO157632

Locations & computers Screenshots Search users and computers

Windows taskbar icons: File Explorer, Microsoft Edge, Visual Studio, etc.

System tray: Network, Volume, Date/Time (15:38)
